# Supplementary material for: Hydrogenolysis of furfuryl alcohol over CuCeMgAl mixed metal oxide catalysts derived from layered double hydroxides
Source: Royal Society of Chemistry journal article supplement (doi:10.1039/d4re00070f), 2024-01-01
Supplement: d4re00070f1.pdf [file d4re00070f1.pdf]

## Supplementary Information

### Hydrogenolysis of furfuryl alcohol over CuCeMgAl mixed metal oxide catalysts derived from layered double hydroxides

*Zhihui Wang, Wenbo Li, Xinyao Fu, Chen Zhang\*, Wei Zhang, Long Huang, and Cuiqing Li\**

Beijing Key Laboratory of Enze Biomass Fine Chemicals, School of New Materials and Chemical Engineering, Beijing Institute of Petrochemical Technology, Beijing 102617, PR China.

\* To whom correspondence should be addressed

zhangc@bipt.edu.cn

licuiqing@bipt.edu.cn

## Table of Contents

Figure S1. Cu 2p XPS spectra of unreduced catalysts.

Figure S2. Ce 3d XPS spectra of unreduced catalysts.

Figure S3. Cu LMM Spectra of CuMgAl and CuCeMgAl catalysts reduced at 550 °C for 3 h.

Figure S4. Ce 3d XPS spectra of CuCeMgAl-3 reduced at 350, 450, or 550 °C for 3 h.

Figure S5. Cu 2p XPS spectra of CuCeMgAl-3 reduced at 350, 450, or 550 °C for 3 h.

Table S1. Literature summary of reduction conditions and catalyst activity of Cu-based catalysts in furfuryl alcohol hydrogenolysis to pentanediols.<sup>a</sup>

Figure S1. Cu 2p XPS spectra of unreduced catalysts.

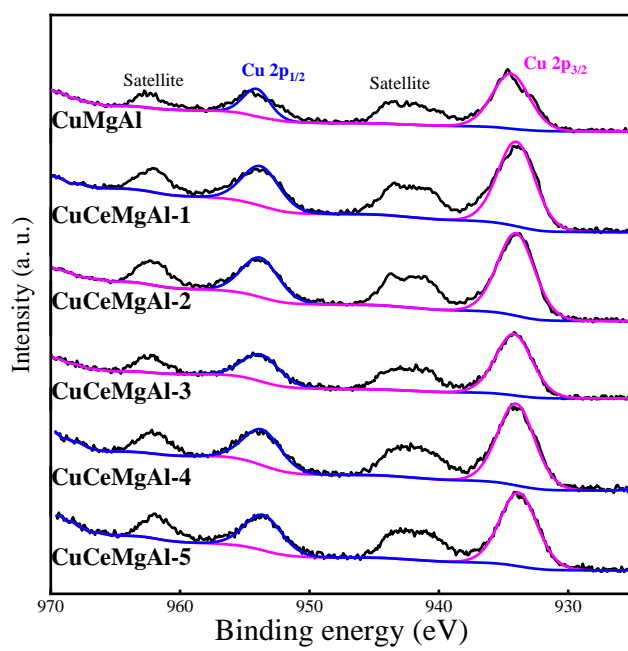

Figure S2. Ce 3d XPS spectra of unreduced catalysts.

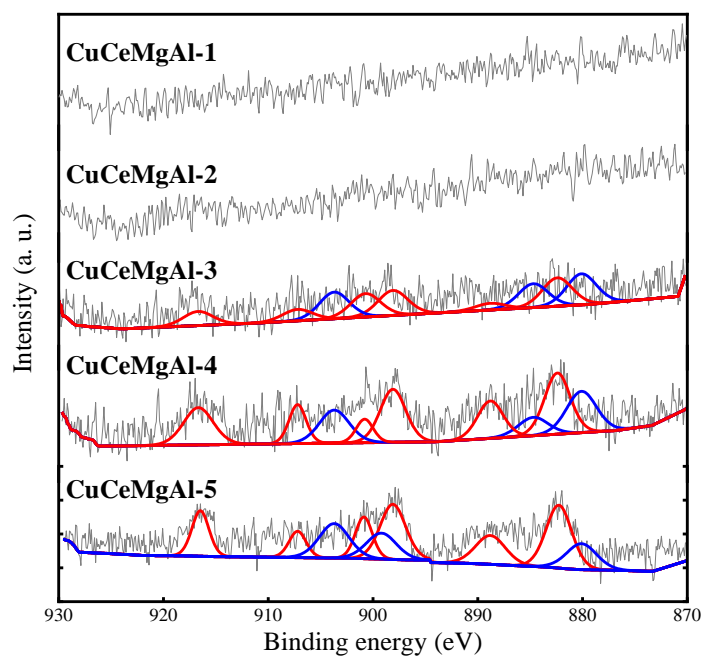

Figure S3. Cu LMM Spectra of CuMgAl and CuCeMgAl catalysts reduced at 550 °C for 3 h.

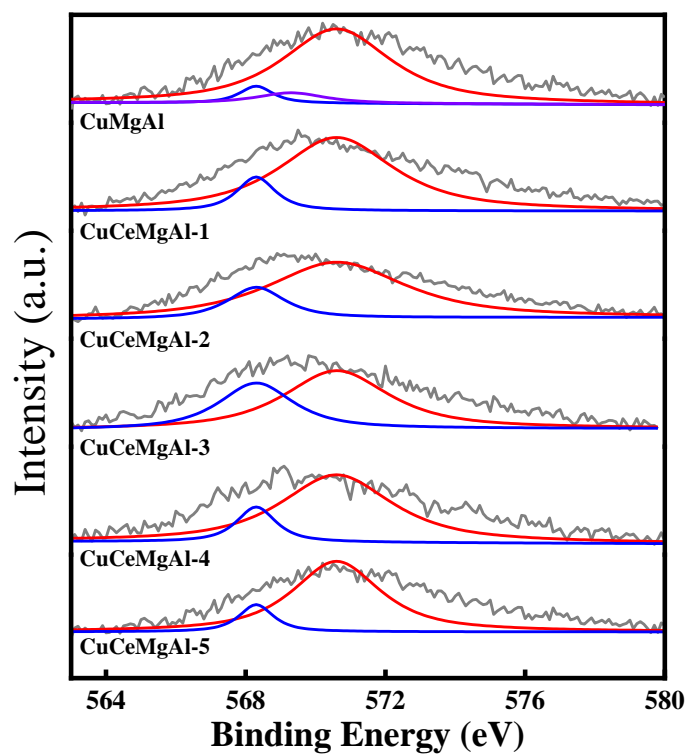

Figure S4. Ce 3d XPS spectra of CuCeMgAl-3 reduced at 350, 450, or 550 °C for 3 h.

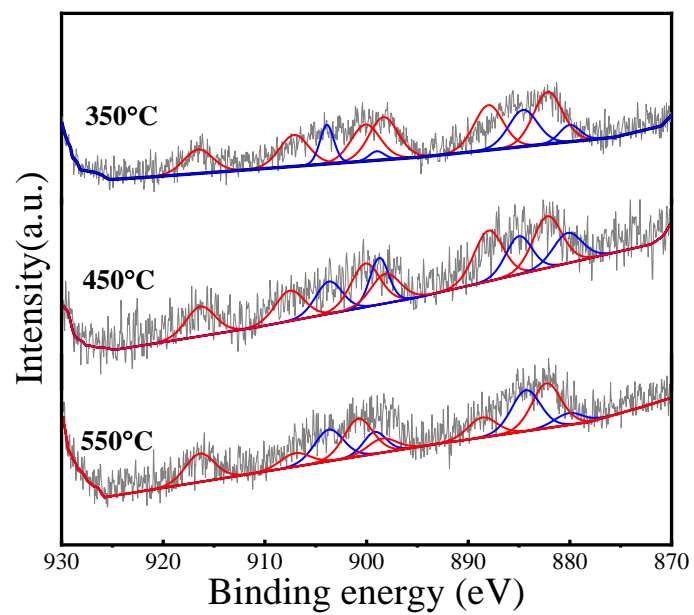

Figure S5. Cu 2p XPS spectra of CuCeMgAl-3 reduced at 350, 450, or 550 °C for 3 h.

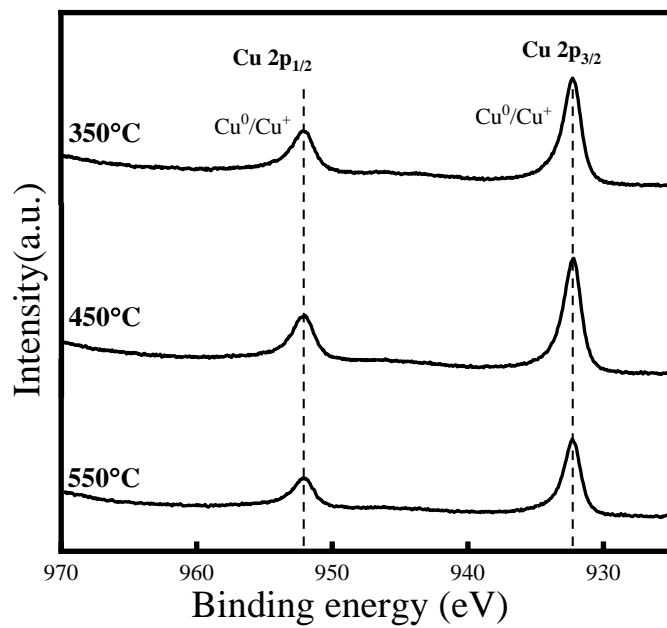

Table S1. Literature summary of reduction conditions and catalyst activity of Cu-based catalysts in furfuryl alcohol hydrogenolysis to pentanediols.<sup>a</sup>

| No. | Catalyst                                                            | Reduction condition                                            | Reaction condition                                                                  | FFA conversion (%) | Pentanediol selectivity (%) |         | Reference |
|-----|---------------------------------------------------------------------|----------------------------------------------------------------|-------------------------------------------------------------------------------------|--------------------|-----------------------------|---------|-----------|
|     |                                                                     |                                                                |                                                                                     |                    | 1,2-PDO                     | 1,5-PDO |           |
| 1   | CuO-Al <sub>2</sub> O <sub>3</sub>                                  | 350°C, 3 h, 20% H <sub>2</sub> -80% N <sub>2</sub> , 40 mL/min | 0.2 g active metal, 40 g 10 wt% FFA in ethanol, 140°C, 6 MPa H <sub>2</sub> , 8 h   | 85.8               | 48.1                        | 22.2    | [1]       |
| 2   | CuMgAl-LDO                                                          | 350°C, 3 h, 20% H <sub>2</sub> -80% N <sub>2</sub> , 40 mL/min | 0.40 g of Cu, 40 g of 10 wt% FFA in ethanol, 140°C, 6 MPa H <sub>2</sub> , 8 h      | 63.1               | 50.0                        | 30.5    | [2]       |
| 3   | Cu-Co-Al MMO                                                        | 300~500°C, 1 h, H <sub>2</sub> , 60 mL/min                     | 0.5 g catalyst, 0.5 g FFA in 25 mL of ethanol, 140°C, 4 MPa H <sub>2</sub> , 2 h    | 41.5               | 18.5                        | 40.4    | [3]       |
| 4   | Cu <sub>0.2</sub> Co <sub>5.8</sub> /Al <sub>2</sub> O <sub>3</sub> | 400°C, 1 h, 5% H <sub>2</sub> /N <sub>2</sub>                  | 0.1 g catalyst, 0.5 g FFA in 19.5 g isopropanol, 140°C, 4 MPa H <sub>2</sub> , 2 h  | 97.2               | 15.9                        | 45.5    | [4]       |
| 5   | CuLaCoO <sub>3</sub>                                                | 300°C, 3h, 5% H <sub>2</sub> -95% N <sub>2</sub> , 40 mL/min   | 0.15 g Cu, 30 g of 5 wt% FFA in ethanol, 140°C, 6 MPa H <sub>2</sub> , 2 h          | 100                | 15.2                        | 40.3    | [5]       |
| 6   | Cu@MgO-La <sub>2</sub> O <sub>3</sub>                               | 450°C, 4 h, H <sub>2</sub> , 150 mL/min                        | 0.3 g catalyst, 1.5 g FFA in 28.5 g isopropanol, 140°C, 6 MPa H <sub>2</sub> , 24 h | 94.9               | 67.1                        | 19.8    | [6]       |
| 7   | Cu <sub>1.8</sub> Mg <sub>1.2</sub> Al                              | 300°C, 2 h, H <sub>2</sub>                                     | 0.04 g catalyst, 0.2 g FFA in 3.8 g isopropanol, 140°C, 6 MPa H <sub>2</sub> , 10 h | 95.2               | 48.3                        | 16.4    | [7]       |
| 8   | CuMgAlO                                                             | -                                                              | 150 °C, FFA in solvent alcohol, 6 MPa, 6 h                                          | 84.1               | 55.2                        | 28.5    | [8]       |
| 9   | Cu <sub>0.1</sub> Co <sub>2.9</sub> Al                              | 400°C, 1 h, H <sub>2</sub> /N <sub>2</sub> (1:3)               | 0.1 g of catalyst, 0.5 g of FA in 40 g of ethanol, 140 °C, 4 MPa, 6 h               | 100                | 10.0                        | 41.1    | [9]       |
| 10  | Al(OH) <sub>3</sub> /Cu                                             | -                                                              | 0.085 g of catalyst, 0.5 g of FFA in 2 mL of isopropanol, 170 °C, 4.5 MPa, 6 h      | 90.8               | 37.1                        | -       | [10]      |
| 11  | CuCeMgAl MMO                                                        | 350~550°C, 3 h, H <sub>2</sub> , 40 mL/min                     | 1 g of catalyst, 3 g of FFA in 25 mL of ethanol, 140 °C, 4 MPa, 6 h                 | 77.3               | 57.7                        | 18.4    | This work |

<sup>a</sup> Abbreviations: FFA, furfuryl alcohol; FA, furfural; 1,2-PDO, 1,2-pentanediol; 1,5-PDO, 1,5-pentanediol.

## Reference

- [1] H. Liu, Z. Huang, H. Kang, C. Xia, J. Chen, Selective hydrogenolysis of biomass-derived furfuryl alcohol into 1,2- and 1,5-pentanediol over highly dispersed Cu-Al<sub>2</sub>O<sub>3</sub> catalysts, *Chinese J. Catal.*, 37 (2016) 700-710.
- [2] H. Liu, Z. Huang, F. Zhao, F. Cui, X. Li, C. Xia, J. Chen, Efficient hydrogenolysis of biomass-derived furfuryl alcohol to 1,2- and 1,5-pentanediols over a non-precious Cu-Mg<sub>3</sub>AlO<sub>4.5</sub> bifunctional catalyst, *Catal. Sci. Tech.*, 6 (2016) 668-671.
- [3] T.P. Sulmonetti, B. Hu, S. Lee, P.K. Agrawal, C.W. Jones, Reduced Cu-Co-Al Mixed Metal Oxides for the Ring-Opening of Furfuryl Alcohol to Produce Renewable Diols, *Acs Sustain Chem Eng*, 5 (2017) 8959-8969.
- [4] J. Tan, Y. Su, X. Hai, L. Huang, J. Cui, Y. Zhu, Y. Wang, Y. Zhao, Conversion of furfuryl alcohol to 1,5-pentanediol over CuCoAl nanocatalyst: The synergetic catalysis between Cu, CoOx and the basicity of metal oxides, *Mol. Catal.*, 526 (2022) 112391.
- [5] F. Gao, H. Liu, X. Hu, J. Chen, Z. Huang, C. Xia, Selective hydrogenolysis of furfuryl alcohol to 1,5- and 1,2-pentanediol over Cu-LaCoO<sub>3</sub> catalysts with balanced Cu<sup>0</sup>-CoO sites, *Chinese J. Catal.*, 39 (2018) 1711-1723.
- [6] Y. Zhu, B. Li, C. Zhao, Cu nanoparticles supported on core-shell MgO-La<sub>2</sub>O<sub>3</sub> catalyzed hydrogenolysis of furfuryl alcohol to pentanediol, *J. Catal.*, 410 (2022) 42-53.
- [7] Y. Shao, J. Wang, H. Du, K. Sun, Z. Zhang, L. Zhang, Q. Li, S. Zhang, Q. Liu, X. Hu, Importance of Magnesium in Cu-Based Catalysts for Selective Conversion of Biomass-Derived Furan Compounds to Diols, *Acs Sustain Chem Eng*, 8 (2020) 5217-5228.
- [8] X. Fu, X. Ren, J. Shen, Y. Jiang, Y. Wang, Y. Orooji, W. Xu, J. Liang, Synergistic catalytic hydrogenation of furfural to 1,2-pentanediol and 1,5-pentanediol with LDO derived from CuMgAl hydrotalcite, *Mol. Catal.*, 499 (2021) 111298.
- [9] X.-q. Hai, J.-j. Tan, J. He, X.-l. Yang, Y.-f. Na, Y.-z. Wang, Y.-x. Zhao, Hydrogenation of furfural to 1,5-pentanediol over CuCo bimetallic catalysts, *Journal of Fuel Chemistry and Technology*, 51 (2023) 959-969.
- [10] H. Li, X. Nie, H. Du, Y. Zhao, J. Mu, Z.C. Zhang, Understanding the Role of Base Species on Reversed Cu Catalyst in Ring Opening of Furan Compounds to 1, 2-Pentanediol, *Chemsuschem*, 17 (2024) e202300880.
